# Supplementary material for: A novel sunflower broomrape race with unusual virulence potentially caused by a mutation
Source: Front Plant Sci. 2023 Oct 6;14:1236511. doi: 10.3389/fpls.2023.1236511 (PMC10587594; doi:10.3389/fpls.2023.1236511)
Supplement: Supplementary file 1 [file Table_1.xlsx]

## Sheet: Hoja1
Supplentary Table 1. Genotype of individual broomrape plants. The populations are described in Table 1 of the manuscript. SNP description can be found in Calderón-González et al. (2019). Nucleotides are codified as follows: A=1; C=2; G=3; T=4.
Reg	Population	SNcum-1		SNcum-2		SNcum-4		SNcum-5		SNcum-6		SNcum-7		SNcum-8		SNcum-9		SNcum-10		SNcum-12		SNcum-14		SNcum-15		SNcum-17		SNcum-19		SNcum-21		SNcum-22		SNcum-23		SNcum-25		SNcum-26		SNcum-27		SNcum-28		SNcum-29		SNcum-30		SNcum-31
1	SE10	2	2	1	1	2	2	2	2	3	3	0	0	3	3	3	3	3	3	2	2	1	1	4	4	3	3	4	4	3	3	2	2	4	4	4	4	4	4	4	4	2	2	4	4	1	1	4	4
2	SE10	2	2	1	1	2	2	2	2	3	3	2	2	3	3	3	3	3	3	2	2	1	1	4	4	3	3	4	4	3	3	2	2	4	4	4	4	4	4	4	4	2	2	4	4	1	1	2	4
3	SE10	2	2	1	1	2	2	2	2	3	3	2	2	3	3	3	3	3	3	2	2	1	1	4	4	3	3	4	4	3	3	2	2	4	4	4	4	4	4	4	4	2	2	4	4	1	1	4	4
4	SE10	2	2	1	1	2	2	2	2	3	3	2	2	3	3	3	3	3	3	2	2	1	1	4	4	3	3	4	4	3	3	2	2	4	4	4	4	4	4	4	4	2	2	4	4	1	1	4	4
5	SE10	2	2	1	1	2	2	2	2	3	3	2	2	3	3	3	3	3	3	2	2	1	1	4	4	3	3	4	4	3	3	2	2	4	4	4	4	4	4	4	4	2	2	4	4	1	1	4	4
6	SE10	2	2	1	1	2	2	2	2	3	3	2	2	3	3	3	3	3	3	2	2	1	1	4	4	3	3	4	4	3	3	2	2	4	4	4	4	4	4	4	4	2	2	4	4	1	1	4	4
7	SE10	2	2	1	1	2	2	2	2	3	3	2	2	3	3	3	3	0	0	2	2	1	1	4	4	3	3	4	4	3	3	2	2	4	4	4	4	4	4	4	4	2	2	4	4	1	1	4	4
8	SE10	2	2	1	1	2	2	2	2	3	3	2	2	3	3	3	3	3	3	2	2	1	1	4	4	3	3	4	4	3	3	2	2	4	4	4	4	4	4	4	4	2	2	4	4	1	1	4	4
9	SE10	2	2	1	1	2	2	2	2	3	3	2	2	3	3	3	3	3	3	2	2	1	1	4	4	3	3	4	4	3	3	2	2	4	4	4	4	4	4	4	4	2	2	4	4	1	1	4	4
10	SE10	2	2	1	1	2	2	2	2	3	3	2	2	3	3	3	3	3	3	2	2	1	1	4	4	3	3	4	4	3	3	2	2	4	4	4	4	4	4	4	4	2	2	4	4	1	1	4	4
11	SE10	2	2	1	1	2	2	2	2	0	0	2	2	3	3	3	3	3	3	2	2	1	1	4	4	3	3	4	4	3	3	2	2	4	4	4	4	4	4	4	4	2	2	0	0	1	1	4	4
12	SE10	2	2	0	0	2	2	2	2	3	3	2	2	3	3	3	3	3	3	2	2	1	1	4	4	3	3	4	4	3	3	2	2	4	4	4	4	4	4	4	4	2	2	4	4	1	1	4	4
13	CO02	2	2	1	1	2	2	2	2	3	3	2	2	3	3	3	3	3	3	2	2	1	1	4	4	3	3	4	4	3	3	2	2	4	4	4	4	4	4	4	4	2	2	4	4	1	1	4	4
14	CO02	2	2	1	1	2	2	2	2	3	3	2	2	3	3	3	3	3	3	2	2	1	1	4	4	3	3	4	4	3	3	2	2	4	4	4	4	4	4	4	4	2	2	4	4	1	1	4	4
15	CO02	2	2	1	1	2	2	2	2	3	3	2	2	3	3	3	3	3	3	2	2	1	1	4	4	3	3	4	4	3	3	2	2	4	4	4	4	4	4	4	4	2	2	4	4	1	1	4	4
16	CO02	2	2	1	1	2	2	2	2	3	3	2	2	3	3	3	3	3	3	2	2	1	1	4	4	3	3	4	4	3	3	2	2	4	4	4	4	4	4	4	4	2	2	4	4	1	1	4	4
17	CO02	2	2	1	1	2	2	2	2	3	3	2	2	3	3	3	3	3	3	2	2	1	1	4	4	3	3	4	4	3	3	2	2	4	4	4	4	4	4	4	4	2	2	4	4	1	1	4	4
18	CO02	2	2	1	1	2	2	2	2	3	3	2	2	3	3	3	3	3	3	2	2	1	1	4	4	3	3	4	4	3	3	2	2	4	4	4	4	4	4	4	4	2	2	4	4	1	1	4	4
19	CO02	2	2	1	1	2	2	2	2	3	3	2	2	3	3	3	3	3	3	2	2	1	1	4	4	3	3	4	4	3	3	2	2	4	4	4	4	4	4	4	4	2	2	4	4	1	1	4	4
20	CO02	2	2	1	1	2	2	2	2	3	3	2	2	3	3	3	3	3	3	2	2	1	1	4	4	3	3	4	4	3	3	2	2	4	4	4	4	4	4	4	4	2	2	4	4	1	1	4	4
21	CO02	2	2	1	1	2	2	2	2	3	3	2	2	3	3	3	3	3	3	2	2	1	1	4	4	3	3	4	4	3	3	2	2	4	4	4	4	4	4	4	4	2	2	4	4	1	1	4	4
22	CO02	2	2	0	0	2	2	2	2	3	3	2	2	3	3	3	3	3	3	2	2	1	1	4	4	3	3	4	4	3	3	2	2	4	4	4	4	4	4	4	4	2	2	4	4	1	1	4	4
23	CO02	2	2	1	1	2	2	2	2	3	3	2	2	3	3	3	3	3	3	2	2	1	1	4	4	3	3	4	4	3	3	2	2	4	4	4	4	4	4	4	4	2	2	4	4	1	1	4	4
24	CO02	2	2	1	1	2	2	2	2	3	3	2	2	3	3	3	3	3	3	2	2	1	1	4	4	3	3	4	4	3	3	2	2	4	4	4	4	4	4	4	4	2	2	4	4	1	1	4	4
25	CU05	2	4	2	2	3	3	3	3	4	4	1	1	2	2	2	2	2	2	1	1	3	3	2	2	1	1	2	2	1	1	4	4	2	2	2	2	3	3	2	2	4	4	3	3	4	4	2	2
26	CU05	2	4	2	2	3	3	3	3	4	4	1	1	2	2	2	2	2	2	1	1	3	3	2	2	1	1	2	2	1	1	4	4	2	2	2	2	3	3	2	2	4	4	3	3	4	4	2	2
27	CU05	2	4	2	2	3	3	3	3	4	4	1	1	2	2	2	2	2	2	1	1	3	3	2	2	1	1	2	2	1	1	4	4	2	2	2	2	3	3	2	2	4	4	3	3	4	4	2	2
28	CU05	2	4	0	0	3	3	3	3	0	0	1	1	2	2	2	2	2	2	1	1	3	3	2	2	1	1	2	2	1	1	4	4	2	2	2	2	3	3	2	2	4	4	3	3	4	4	2	2
29	CU05	2	4	2	2	3	3	3	3	4	4	1	1	2	2	2	2	2	2	1	1	3	3	2	2	1	1	2	2	1	1	4	4	2	2	2	2	3	3	2	2	4	4	3	3	4	4	2	2
30	CU05	2	4	2	2	3	3	3	3	4	4	1	1	2	2	2	2	2	2	1	1	3	3	2	2	1	1	2	2	1	1	4	4	2	2	2	2	0	0	2	2	4	4	3	3	4	4	2	2
31	CU05	2	4	2	2	3	3	3	3	4	4	1	1	2	2	2	2	2	2	1	1	3	3	2	2	1	1	2	2	1	1	4	4	2	2	2	2	3	3	2	2	4	4	3	3	4	4	2	2
32	CU05	2	4	2	2	3	3	3	3	4	4	1	1	2	2	2	2	2	2	1	1	3	3	2	2	1	1	2	2	1	1	4	4	2	2	2	2	3	3	2	2	4	4	3	3	4	4	2	2
33	CU05	2	4	2	2	3	3	3	3	4	4	1	1	2	2	2	2	2	2	1	1	3	3	2	2	1	1	2	2	1	1	4	4	2	2	2	2	3	3	2	2	4	4	3	3	4	4	2	2
34	CU05	2	4	2	2	3	3	3	3	4	4	1	1	2	2	2	2	2	2	1	1	3	3	2	2	1	1	2	2	1	1	4	4	2	2	2	2	3	3	2	2	4	4	3	3	4	4	2	2
35	CU05	2	4	2	2	3	3	3	3	4	4	1	1	2	2	2	2	2	2	1	1	3	3	2	2	1	1	2	2	1	1	4	4	2	2	2	2	3	3	2	2	4	4	3	3	4	4	2	2
36	CU08	2	4	2	2	3	3	3	3	4	4	1	1	2	2	2	2	2	2	1	1	3	3	2	2	1	1	2	2	1	1	4	4	2	2	2	2	3	3	2	2	4	4	3	3	4	4	2	2
37	CU08	2	4	2	2	3	3	3	3	4	4	1	1	2	2	2	2	2	2	1	1	3	3	2	2	1	1	2	2	1	1	4	4	2	2	2	2	3	3	2	2	4	4	3	3	4	4	2	2
38	CU08	2	4	2	2	3	3	3	3	4	4	1	1	2	2	2	2	2	2	1	1	3	3	2	2	1	1	2	2	1	1	4	4	2	2	2	2	3	3	2	2	4	4	3	3	4	4	2	2
39	CU08	2	4	2	2	3	3	3	3	4	4	1	1	2	2	2	2	2	2	1	1	3	3	2	2	1	1	2	2	1	1	4	4	2	2	2	2	3	3	2	2	4	4	3	3	4	4	2	2
40	CU08	2	4	2	2	3	3	3	3	4	4	1	1	2	2	2	2	2	2	1	1	3	3	2	2	1	1	2	2	1	1	4	4	2	2	2	2	3	3	2	2	4	4	3	3	4	4	2	2
41	CU08	2	4	2	2	3	3	3	3	4	4	1	1	2	2	2	2	2	2	1	1	3	3	2	2	1	1	2	2	1	1	4	4	2	2	2	2	3	3	2	2	4	4	3	3	4	4	2	2
42	CU08	2	4	2	2	3	3	3	3	4	4	1	1	2	2	2	2	2	2	1	1	3	3	2	2	1	1	2	2	1	1	4	4	2	2	2	2	3	3	2	2	4	4	3	3	4	4	2	2
43	CU08	2	4	2	2	3	3	3	3	4	4	1	1	2	2	2	2	2	2	1	1	3	3	2	2	1	1	2	2	1	1	4	4	2	2	2	2	3	3	2	2	4	4	3	3	4	4	2	2
44	CU08	2	4	2	2	3	3	3	3	4	4	1	1	2	2	2	2	2	2	1	1	3	3	2	2	1	1	2	2	1	1	4	4	2	2	2	2	3	3	2	2	4	4	3	3	4	4	2	2
45	CU08	2	4	2	2	3	3	0	0	4	4	1	1	2	2	2	2	2	2	1	1	3	3	2	2	1	1	2	2	1	1	4	4	2	2	2	2	3	3	2	2	4	4	3	3	4	4	2	2
46	CU08	2	4	2	2	3	3	3	3	4	4	1	1	2	2	2	2	2	2	1	1	3	3	2	2	1	1	2	2	1	1	4	4	2	2	2	2	3	3	2	2	4	4	3	3	4	4	2	2
47	CU08	2	4	2	2	3	3	3	3	4	4	1	1	2	2	2	2	2	2	1	1	3	3	2	2	1	1	2	2	1	1	4	4	2	2	2	2	3	3	2	2	4	4	3	3	4	4	2	2
48	NGV1	2	2	2	2	2	2	2	2	4	4	1	1	3	3	2	2	3	2	2	1	1	1	4	4	3	3	2	2	3	3	2	4	2	2	4	4	4	4	4	4	2	2	3	3	4	4	2	2
49	NGV1	2	4	1	1	3	3	3	3	3	3	2	2	3	3	2	2	2	2	1	1	1	1	2	2	1	1	2	2	3	3	4	4	2	2	2	2	4	4	4	4	4	4	3	4	4	4	4	4
50	NGV1	2	2	2	1	3	3	3	3	3	3	2	2	2	2	2	2	2	2	2	2	1	1	4	2	3	3	2	2	3	1	4	4	2	2	4	2	4	4	4	4	2	2	4	4	4	4	2	4
51	NGV1	2	2	2	1	2	2	3	3	4	3	1	1	2	2	2	2	2	2	2	2	3	3	4	4	3	3	4	4	1	1	2	2	2	2	2	2	4	4	4	4	2	2	4	4	1	1	2	4
52	NGV1	2	4	2	1	3	3	3	3	4	3	1	1	2	2	2	3	2	2	1	1	1	1	4	4	1	1	2	2	3	3	4	4	2	4	2	2	4	4	4	4	2	2	4	4	4	4	2	4
53	NGV1	2	4	1	1	2	2	3	3	3	3	1	1	3	3	2	3	2	2	2	2	1	1	2	2	3	1	2	2	3	3	4	4	2	4	2	2	3	4	4	4	4	4	3	3	4	4	4	4
54	NGV1	2	2	2	2	3	3	3	3	4	4	2	2	3	3	3	3	2	2	1	1	1	1	4	4	3	3	2	2	3	3	4	4	2	2	4	4	4	4	4	4	4	2	3	3	4	4	2	2
55	NGV1	2	2	1	1	2	2	2	2	3	3	2	1	3	3	3	3	3	2	2	2	3	3	4	2	3	3	4	2	3	3	2	4	2	2	4	4	4	4	4	4	4	4	4	4	1	4	4	4
56	NGV1	2	2	2	2	2	2	0	0	4	4	2	1	2	2	2	3	2	2	1	1	1	1	2	2	3	3	2	2	3	3	4	4	4	4	4	2	3	3	4	4	2	2	4	4	4	4	2	2
57	NGV1	2	4	2	2	3	3	3	3	4	4	2	2	3	3	3	3	2	2	2	2	1	1	4	4	3	3	2	2	3	3	4	4	4	4	2	2	4	4	4	4	2	2	3	3	4	4	2	2
58	NGV1	2	4	1	1	2	2	2	2	3	3	2	2	3	3	2	3	3	2	1	1	1	1	4	4	3	3	2	2	3	3	4	4	0	0	2	2	4	4	4	4	2	2	4	4	4	4	4	4
59	NGV1	2	2	1	1	3	3	2	2	3	3	2	2	2	2	2	2	2	2	2	2	3	3	2	2	1	1	2	2	3	3	4	4	2	2	2	2	3	3	4	4	2	2	3	3	4	4	4	4
60	NGV1	2	2	1	1	2	2	2	2	3	3	2	2	3	3	2	2	2	2	1	1	1	1	4	4	3	3	2	2	3	3	4	4	2	2	4	4	4	4	4	4	2	2	3	3	4	4	4	4
61	NGV1	2	2	1	1	2	2	3	3	3	3	2	2	3	3	2	2	3	3	1	1	1	1	2	2	3	1	2	2	3	3	4	4	4	4	4	4	4	4	4	4	2	2	4	4	4	4	4	4
62	NGV1	2	2	1	1	3	3	3	3	3	3	1	1	3	3	2	2	2	2	1	1	1	1	4	4	1	1	2	2	3	3	4	4	2	4	2	2	4	4	4	4	4	4	4	4	4	4	4	4
63	NGV1	2	2	2	2	2	2	3	3	4	4	1	1	2	2	3	3	2	2	2	2	1	1	2	2	3	3	2	2	3	3	4	4	2	2	0	0	3	3	4	4	2	2	4	4	4	4	2	2
64	NGV1	2	2	2	2	3	3	2	2	4	4	1	1	3	3	2	2	3	2	2	2	1	1	2	2	3	3	2	2	3	3	2	4	2	4	4	4	4	4	4	4	2	2	3	3	4	4	2	2
65	NGV1	2	2	2	1	2	2	0	0	4	3	2	2	3	3	2	2	2	2	1	1	1	1	4	4	3	3	2	2	3	3	4	4	2	2	2	2	4	4	4	4	2	2	4	4	4	4	2	4
66	NGV1	2	2	2	2	2	2	2	2	4	4	2	2	3	3	2	2	3	3	2	1	1	1	4	4	3	3	4	4	3	3	2	2	4	4	4	4	4	4	4	4	2	2	3	3	1	1	2	2
67	NGV1	2	2	1	1	2	3	2	2	3	3	2	1	3	3	2	3	3	3	2	2	1	1	4	4	3	3	2	2	3	3	4	4	4	4	4	4	4	4	4	4	2	2	4	4	4	4	4	4
68	NGV1	2	2	2	2	2	3	2	2	4	4	2	2	3	3	3	3	3	2	2	2	1	1	2	2	1	1	2	2	3	3	2	4	2	2	4	4	4	4	4	4	2	2	4	4	4	4	2	2
69	NGV1	2	2	2	2	3	3	3	3	4	4	2	2	3	3	3	3	2	2	1	1	1	1	2	2	3	3	2	2	3	3	4	4	2	2	2	2	4	4	4	4	2	2	3	3	4	4	2	2
70	NGV1	2	4	2	1	2	2	0	0	0	0	2	2	3	3	2	3	3	2	1	1	1	1	4	4	3	1	2	2	3	3	2	4	2	2	2	2	4	4	4	4	2	2	4	4	4	4	2	4
71	NGV1	2	2	2	2	2	3	2	2	4	4	2	2	3	3	3	3	3	3	2	2	1	1	2	2	1	1	2	2	3	3	2	2	2	2	4	4	4	4	4	4	2	2	4	4	4	4	2	2
72	NGV2	2	4	1	1	2	2	3	3	3	3	2	2	3	3	2	2	3	3	2	2	1	1	4	2	3	3	2	2	3	3	2	2	4	4	2	2	4	4	4	4	2	2	4	4	4	4	4	4
73	NGV2	2	2	1	1	2	2	3	3	3	3	2	2	3	3	2	2	3	3	2	2	1	1	4	2	3	3	2	2	3	3	2	2	4	4	2	2	4	4	4	4	2	2	4	4	4	4	4	4
74	NGV2	2	2	1	1	2	2	2	2	3	3	2	2	3	3	2	2	2	2	2	2	1	1	4	4	3	3	2	2	3	3	4	4	2	2	4	4	4	4	4	4	2	2	3	3	4	4	4	4
75	NGV2	2	2	1	1	2	2	3	3	3	3	2	2	3	3	3	3	3	3	2	2	1	1	4	4	1	1	4	2	3	3	2	2	2	4	4	4	4	4	4	4	2	2	3	3	1	4	4	4
76	NGV2	2	4	1	1	2	2	3	3	3	3	2	2	3	3	2	2	3	3	2	2	1	1	4	4	3	3	2	2	3	3	2	2	4	4	2	2	4	4	4	4	2	2	4	4	4	4	4	4
77	NGV2	2	2	1	1	2	2	2	2	3	3	2	2	3	2	3	3	3	3	2	2	1	1	4	4	3	3	4	2	3	3	2	4	2	4	4	4	3	4	4	4	2	2	4	4	1	4	4	4
78	NGV2	2	2	1	1	2	2	3	3	3	3	2	2	3	3	2	2	2	2	2	2	1	1	4	4	3	3	2	2	3	3	4	4	4	4	4	4	3	3	4	4	2	2	3	3	4	4	4	4
79	NGV2	2	2	1	1	2	3	2	2	3	3	2	2	3	3	2	2	2	2	2	1	1	1	4	4	3	3	2	2	3	3	4	4	2	4	4	2	4	4	4	4	2	2	4	4	4	4	4	4
80	NGV2	2	4	1	1	3	3	3	3	3	3	1	1	3	3	2	2	2	2	2	2	1	1	2	2	1	1	2	2	1	1	4	4	2	2	2	2	4	4	4	4	2	2	3	3	4	4	4	4
81	NGV2	2	2	1	1	2	2	2	2	3	3	2	2	3	3	3	3	2	2	2	2	1	1	4	4	1	1	2	2	3	3	4	4	4	4	4	4	4	4	4	4	2	2	4	4	4	4	4	4
82	NGV2	2	2	1	1	2	2	2	2	3	3	2	2	3	3	2	3	2	2	2	2	1	1	4	4	3	3	2	2	3	3	4	4	4	4	4	4	4	4	4	4	2	2	3	4	4	4	4	4
83	NGV2	2	2	1	1	2	2	3	3	3	3	2	2	3	3	2	2	2	2	2	2	1	1	4	4	3	3	2	2	3	3	4	4	4	4	4	4	3	3	4	4	2	2	3	3	4	4	4	4
84	NGV2	2	4	1	1	2	2	3	3	3	3	2	2	3	3	2	2	3	3	2	2	1	1	2	2	3	3	2	2	3	3	2	2	4	4	4	2	4	4	4	4	2	2	4	4	4	4	4	4
85	NGV2	2	2	1	1	2	2	3	3	3	3	2	2	3	3	2	3	3	2	2	2	1	1	4	4	3	3	4	2	3	3	0	0	4	4	2	2	4	4	4	4	2	2	4	4	1	4	4	4
86	NGV2	2	2	1	1	2	2	2	2	3	3	2	2	3	3	3	3	3	3	2	2	1	1	4	4	3	3	2	2	3	3	4	4	2	2	4	4	4	4	4	4	2	2	4	4	4	4	4	4
87	NGV2	2	2	1	1	2	2	2	2	3	3	2	2	3	3	3	3	2	2	2	2	1	1	4	4	3	3	2	2	3	3	4	4	4	4	4	4	3	3	4	4	2	2	4	4	4	4	4	4
88	NGV2	2	2	1	1	2	2	3	3	3	3	2	2	3	3	3	3	3	3	2	2	1	1	4	4	3	3	4	2	3	3	2	4	4	4	4	4	4	4	2	2	2	2	3	4	1	4	4	4
89	NGV2	2	2	1	1	2	2	2	2	3	3	2	2	3	3	3	3	3	3	2	2	1	1	4	4	3	3	2	2	3	3	2	2	4	4	4	4	4	4	4	4	2	2	4	4	4	4	4	4
90	NGV2	2	2	1	1	2	2	2	2	3	3	2	2	3	3	2	3	2	2	2	2	1	1	4	4	3	3	2	2	3	3	4	4	4	4	4	4	3	4	4	4	2	2	3	3	4	4	4	4
91	NGV2	2	2	2	2	3	3	3	3	4	4	2	2	3	3	3	3	2	2	1	1	1	1	4	4	3	1	2	2	3	3	4	4	2	2	4	4	4	4	4	4	2	2	3	3	4	4	2	2
92	NGV2	2	4	1	1	2	2	3	3	3	3	2	2	3	3	2	2	3	3	2	2	1	1	2	2	3	3	2	2	3	3	2	2	4	4	2	2	4	4	4	4	2	2	4	4	4	4	4	4
93	NGV2	2	4	1	1	2	2	3	3	3	3	2	2	3	3	2	2	3	3	2	2	1	1	4	4	3	3	2	2	3	3	2	2	4	4	2	2	4	4	4	4	2	2	4	4	4	4	4	4
94	NGV2	2	2	1	1	2	2	2	2	3	3	2	2	3	3	3	3	3	3	2	2	1	1	4	4	3	3	4	4	3	3	2	2	4	4	4	4	4	4	4	4	2	2	4	4	1	1	4	4
95	NGV2	2	2	1	1	2	2	3	3	3	3	2	2	3	3	2	2	3	3	2	2	1	1	4	2	3	3	4	4	3	3	2	2	4	4	4	2	4	4	4	4	2	2	4	4	1	1	4	4
96	NGV3	2	4	1	1	2	2	2	2	3	3	2	2	3	2	2	3	3	3	2	2	1	1	4	4	3	3	2	2	3	3	4	4	2	4	4	4	4	4	4	4	2	2	3	3	4	4	4	4
97	NGV3	2	4	2	2	2	2	2	2	4	4	2	2	3	3	3	3	3	3	2	2	1	1	4	4	3	3	2	2	3	3	4	4	4	4	4	4	4	4	4	4	2	2	3	3	4	4	2	2
98	NGV3	2	2	2	1	2	2	2	2	0	0	2	2	3	3	2	3	3	3	2	2	1	1	4	4	0	0	4	2	3	3	2	2	4	4	4	4	4	4	4	4	2	2	4	4	1	4	2	4
99	NGV3	2	2	1	1	2	2	2	2	3	3	1	1	2	2	2	3	3	2	2	2	1	1	4	4	3	3	4	2	3	3	2	4	4	4	4	4	4	4	4	4	2	2	4	4	1	4	4	4
100	NGV3	2	2	1	1	2	2	2	2	3	3	2	2	3	3	2	2	3	3	2	2	1	1	2	2	3	3	2	2	3	3	2	2	2	2	4	4	4	4	4	4	2	2	4	4	4	4	4	4
101	NGV3	2	2	1	1	2	2	2	2	3	3	2	2	3	3	2	2	3	3	2	2	1	1	2	2	3	3	2	2	3	3	2	2	2	2	4	4	4	4	2	4	2	2	4	4	4	4	4	4
102	NGV3	2	2	1	1	2	3	0	0	3	3	2	1	3	3	2	3	3	2	2	2	1	1	4	2	3	1	2	2	3	3	4	4	2	2	4	4	4	4	4	4	2	2	4	4	4	4	4	4
103	NGV3	2	2	1	1	2	2	2	2	3	3	2	2	3	3	2	2	3	3	2	2	1	1	2	2	3	3	2	2	3	3	2	2	2	2	4	4	4	4	2	2	2	2	4	4	4	4	4	4
104	NGV3	2	4	2	1	2	2	2	2	4	3	2	2	3	2	3	3	3	3	2	2	1	1	4	2	3	3	2	2	3	3	2	2	4	4	4	4	4	4	2	2	2	2	4	4	4	4	2	4
105	NGV3	2	0	1	1	2	2	2	2	3	3	2	2	3	3	2	3	3	3	2	2	1	1	4	4	3	3	2	2	3	3	4	4	4	4	4	4	4	4	4	4	2	2	4	4	4	4	4	4
106	NGV3	2	2	1	1	2	2	3	3	3	3	2	2	3	3	2	2	3	3	2	2	1	1	2	2	3	3	2	2	3	3	2	2	4	4	4	4	4	4	2	4	2	2	4	4	4	4	4	4
107	NGV3	2	2	1	1	2	2	2	2	3	3	2	2	3	2	2	3	3	3	2	2	1	1	4	2	3	3	4	2	3	3	2	2	2	2	4	4	4	4	2	4	2	2	4	4	1	4	4	4
108	NGV3	2	2	1	1	2	2	2	2	3	3	2	1	3	2	3	3	3	3	2	2	1	1	4	2	3	3	2	2	3	3	2	4	2	2	4	4	4	4	2	4	4	2	4	4	4	4	4	4
109	NGV3	2	2	1	1	2	2	2	2	3	3	2	2	3	3	2	2	3	3	2	2	1	1	2	2	3	3	2	2	3	3	2	2	2	2	4	4	4	4	2	2	2	2	4	4	4	4	4	4
110	NGV3	2	4	1	1	2	2	2	2	3	3	2	2	2	2	2	2	3	3	2	2	1	1	4	4	3	3	2	2	3	3	4	4	4	4	4	4	4	4	2	2	2	2	3	3	4	4	4	4
111	NGV3	2	2	1	1	2	2	2	2	3	3	2	2	3	3	3	3	3	3	2	2	1	1	4	4	3	3	4	2	3	3	2	4	2	2	4	4	4	4	4	4	2	2	3	4	1	4	4	4
112	NGV3	2	2	2	2	2	2	2	2	4	4	2	2	3	2	2	2	3	3	2	2	1	1	4	4	3	3	4	4	3	3	2	2	4	4	4	4	4	4	4	4	2	2	4	4	1	1	2	2
113	NGV3	2	2	2	2	2	2	2	2	4	4	2	2	3	2	3	3	3	3	2	2	1	1	4	2	3	3	2	2	3	3	4	4	2	4	4	4	4	4	4	4	4	2	3	3	4	4	2	2
114	NGV3	2	4	1	1	2	2	2	2	3	3	2	2	2	2	2	2	3	3	2	2	1	1	4	4	3	3	2	2	3	3	4	4	2	2	4	4	4	4	4	4	2	2	3	3	4	4	4	4
115	NGV3	2	2	1	1	2	2	2	2	3	3	2	2	3	3	2	2	3	3	2	2	1	1	2	2	3	3	2	2	3	3	2	2	2	4	4	4	4	4	4	4	4	4	4	4	4	4	4	4
116	NGV3	2	4	1	1	2	2	2	2	3	3	2	2	2	2	3	3	3	3	2	2	1	1	4	4	3	3	4	4	3	3	2	2	2	2	4	4	4	4	4	4	2	2	3	3	1	1	4	4
117	NGV3	2	2	2	1	2	2	2	2	4	3	2	2	3	3	2	3	3	2	2	1	1	1	4	4	3	1	2	2	3	3	4	4	4	4	4	4	4	4	4	4	2	2	4	4	4	4	2	4
118	NGV3	2	2	1	1	2	2	2	2	3	3	2	2	3	3	2	2	3	3	2	2	1	1	2	2	3	3	2	2	3	3	2	2	2	2	4	4	4	4	2	4	2	2	4	4	4	4	4	4
119	NGV3	2	2	1	1	2	2	2	2	3	3	2	2	3	3	2	2	3	3	2	2	1	1	4	2	3	3	2	2	3	3	2	4	2	2	4	4	4	4	4	4	2	2	3	4	4	4	4	4
120	NCU1	2	4	2	2	3	3	3	3	4	4	1	1	2	2	2	2	2	2	1	1	3	3	2	2	1	1	2	2	1	1	4	4	2	2	2	2	3	3	2	2	4	4	3	3	4	4	2	2
121	NCU1	2	4	2	2	3	3	3	3	4	4	1	1	2	2	2	2	2	2	1	1	3	3	2	2	1	1	2	2	1	1	4	4	2	2	2	2	3	3	2	2	4	4	3	3	4	4	2	2
122	NCU1	2	4	2	2	3	3	3	3	4	4	1	1	2	2	2	2	2	2	1	1	3	3	2	2	1	1	2	2	1	1	4	4	2	2	2	2	3	3	2	2	4	4	3	3	4	4	2	2
123	NCU1	2	4	2	2	3	3	3	3	4	4	1	1	2	2	2	2	2	2	1	1	3	3	2	2	1	1	2	2	1	1	4	4	2	2	2	2	3	3	2	2	4	4	3	3	4	4	2	2
124	NCU1	2	4	2	2	3	3	3	3	4	4	1	1	2	2	2	2	2	2	1	1	3	3	2	2	1	1	2	2	1	1	4	4	2	2	2	2	3	3	2	2	4	4	3	3	4	4	2	2
125	NCU1	2	4	2	2	3	3	3	3	4	4	1	1	2	2	2	2	2	2	1	1	3	3	2	2	1	1	2	2	1	1	4	4	2	2	2	2	3	3	2	2	4	4	3	3	4	4	2	2
126	NCU1	2	4	2	2	3	3	3	3	4	4	1	1	2	2	2	2	2	2	1	1	3	3	2	2	1	1	2	2	1	1	4	4	2	2	2	2	3	3	2	2	4	4	3	3	4	4	2	2
127	NCU1	2	4	2	2	3	3	3	3	4	4	1	1	2	2	2	2	2	2	1	1	3	3	2	2	1	1	2	2	1	1	4	4	2	2	2	2	3	3	2	2	4	4	3	3	4	4	2	2
128	NCU1	2	4	2	2	3	3	3	3	4	4	1	1	2	2	2	2	2	2	1	1	3	3	2	2	1	1	2	2	1	1	4	4	2	2	2	2	3	3	2	2	4	4	3	3	4	4	2	2
129	NCU1	2	4	2	2	3	3	3	3	4	4	1	1	2	2	2	2	2	2	1	1	3	3	2	2	1	1	2	2	1	1	4	4	2	2	2	2	3	3	2	2	4	4	3	3	4	4	2	2
130	NCU1	2	4	2	2	3	3	3	3	4	4	1	1	2	2	2	2	2	2	1	1	3	3	2	2	1	1	2	2	1	1	4	4	2	2	2	2	3	3	2	2	4	4	3	3	4	4	2	2
131	NCU1	2	4	2	2	3	3	3	3	4	4	1	1	2	2	2	2	2	2	1	1	3	3	2	2	1	1	2	2	1	1	4	4	2	2	2	2	3	3	2	2	4	4	3	3	4	4	2	2
132	NCU1	2	4	2	2	3	3	3	3	4	4	1	1	2	2	2	2	2	2	1	1	3	3	2	2	1	1	2	2	1	1	4	4	2	2	2	2	3	3	2	2	4	4	3	3	4	4	2	2
133	NCU1	2	4	2	2	3	3	3	3	4	4	1	1	2	2	2	2	2	2	1	1	3	3	2	2	1	1	2	2	1	1	4	4	2	2	2	2	3	3	2	2	4	4	3	3	4	4	2	2
134	NCU1	2	4	2	2	3	3	3	3	4	4	1	1	2	2	2	2	2	2	1	1	3	3	2	2	1	1	2	2	1	1	4	4	2	2	2	2	3	3	2	2	4	4	3	3	4	4	2	2
135	NCU1	2	4	2	2	3	3	3	3	4	4	1	1	2	2	2	2	2	2	1	1	3	3	2	2	1	1	2	2	1	1	4	4	2	2	2	2	3	3	2	2	4	4	3	3	4	4	2	2
136	NCU1	2	4	2	2	3	3	3	3	4	4	1	1	2	2	2	2	2	2	1	1	3	3	2	2	1	1	2	2	1	1	4	4	2	2	2	2	3	3	2	2	4	4	3	3	4	4	2	2
137	NCU1	2	4	2	2	3	3	3	3	4	4	1	1	2	2	2	2	2	2	1	1	3	3	2	2	1	1	2	2	1	1	4	4	2	2	2	2	3	3	2	2	4	4	3	3	4	4	2	2
138	NCU1	2	4	2	2	3	3	3	3	4	4	1	1	2	2	2	2	2	2	1	1	3	3	2	2	1	1	2	2	1	1	4	4	2	2	2	2	3	3	2	2	4	4	3	3	4	4	0	0
139	NCU1	2	4	2	2	3	3	3	3	4	4	1	1	2	2	2	2	2	2	1	1	3	3	2	2	1	1	2	2	1	1	4	4	2	2	2	2	3	3	2	2	4	4	3	3	4	4	2	2
140	NCU1	2	4	2	2	3	3	3	3	4	4	1	1	2	2	2	2	2	2	1	1	3	3	2	2	1	1	2	2	1	1	4	4	2	2	2	2	3	3	2	2	4	4	3	3	4	4	2	2
141	NCU1	2	4	2	2	3	3	3	3	4	4	1	1	2	2	2	2	2	2	1	1	3	3	2	2	1	1	2	2	1	1	4	4	2	2	2	2	3	3	2	2	4	4	3	3	4	4	2	2
142	NCU1	2	4	2	2	3	3	3	3	4	4	1	1	2	2	2	2	2	2	1	1	3	3	2	2	1	1	2	2	1	1	4	4	2	2	2	2	3	3	2	2	4	4	3	3	4	4	2	2
143	NCU1	2	4	2	2	3	3	3	3	4	4	1	1	2	2	2	2	0	0	1	1	3	3	2	2	1	1	2	2	1	1	4	4	2	2	2	2	3	3	2	2	4	4	3	3	4	4	2	2
144	NCU1	2	4	2	2	3	3	3	3	4	4	1	1	2	2	2	2	2	2	1	1	3	3	2	2	1	1	2	2	1	1	4	4	2	2	2	2	3	3	2	2	4	4	3	3	4	4	2	2
145	NCU1	2	4	2	2	3	3	3	3	0	0	1	1	2	2	2	2	2	2	1	1	3	3	2	2	1	1	2	2	1	1	4	4	2	2	2	2	3	3	2	2	4	4	3	3	4	4	2	2
146	NCU1	2	4	2	2	3	3	3	3	4	4	1	1	2	2	2	2	2	2	1	1	3	3	0	0	1	1	2	2	1	1	4	4	2	2	2	2	3	3	2	2	4	4	3	3	4	4	2	2
147	NCU1	2	4	2	2	3	3	3	3	4	4	1	1	2	2	2	2	2	2	1	1	3	3	2	2	1	1	2	2	1	1	4	4	2	2	2	2	3	3	2	2	4	4	3	3	4	4	2	2
148	NCU1	2	4	2	2	3	3	3	3	4	4	1	1	2	2	2	2	2	2	1	1	3	3	2	2	1	1	2	2	1	1	4	4	2	2	2	2	3	3	2	2	4	4	3	3	4	4	2	2
149	NCU1	2	4	2	2	3	3	3	3	4	4	1	1	2	2	2	2	0	0	1	1	3	3	2	2	1	1	2	2	1	1	4	4	2	2	2	2	3	3	2	2	4	4	3	3	4	4	2	2
150	NCU1	2	4	2	2	3	3	3	3	4	4	1	1	2	2	2	2	2	2	1	1	3	3	2	2	1	1	2	2	1	1	4	4	2	2	2	2	3	3	2	2	4	4	3	3	4	4	2	2
151	NCU1	2	4	2	2	3	3	3	3	4	4	1	1	2	2	2	2	2	2	1	1	3	3	2	2	1	1	2	2	1	1	4	4	2	2	2	2	3	3	2	2	4	4	3	3	4	4	2	2
152	NCU1	2	4	2	2	3	3	3	3	4	4	1	1	2	2	2	2	2	2	1	1	3	3	2	2	1	1	2	2	1	1	4	4	2	2	2	2	3	3	2	2	4	4	3	3	4	4	2	2
153	NCU1	2	4	2	2	3	3	3	3	4	4	1	1	2	2	2	2	2	2	1	1	3	3	2	2	1	1	2	2	1	1	4	4	2	2	2	2	3	3	2	2	4	4	3	3	4	4	2	2
154	NCU1	2	4	2	2	3	3	3	3	4	4	1	1	2	2	2	2	2	2	1	1	3	3	2	2	1	1	2	2	1	1	4	4	2	2	2	2	3	3	2	2	4	4	3	3	4	4	2	2
155	NCU1	2	4	2	2	3	3	3	3	4	4	1	1	2	2	2	2	2	2	1	1	3	3	2	2	1	1	2	2	1	1	4	4	2	2	2	2	3	3	2	2	4	4	3	3	4	4	2	2
156	NCU1	2	4	2	2	3	3	3	3	4	4	1	1	2	2	2	2	2	2	1	1	3	3	2	2	1	1	2	2	1	1	4	4	2	2	2	2	3	3	2	2	4	4	3	3	4	4	2	2
157	NCU1	2	4	2	2	3	3	3	3	4	4	1	1	2	2	2	2	2	2	1	1	3	3	2	2	1	1	2	2	1	1	4	4	2	2	2	2	3	3	2	2	4	4	3	3	4	4	2	2
158	NCU1	2	4	2	2	3	3	3	3	4	4	1	1	2	2	2	2	2	2	1	1	3	3	2	2	1	1	2	2	1	1	4	4	2	2	2	2	3	3	2	2	4	4	3	3	4	4	2	2
159	NCU1	2	4	2	2	3	3	3	3	4	4	1	1	2	2	2	2	2	2	1	1	3	3	2	2	1	1	2	2	1	1	4	4	2	2	2	2	3	3	2	2	4	4	3	3	4	4	2	2
160	NCU2	2	4	2	2	3	3	3	3	4	4	1	1	2	2	2	2	2	2	1	1	3	3	2	2	1	1	2	2	1	1	4	4	2	2	2	2	3	3	2	2	4	4	3	3	4	4	2	2
161	NCU2	2	4	2	2	3	3	3	3	4	4	1	1	2	2	2	2	2	2	1	1	3	3	2	2	0	0	2	2	1	1	4	4	2	2	2	2	3	3	2	2	4	4	3	3	4	4	2	2
162	NCU2	2	4	2	2	3	3	3	3	4	4	1	1	2	2	2	2	2	2	1	1	3	3	2	2	1	1	2	2	1	1	4	4	2	2	2	2	3	3	2	2	4	4	3	3	4	4	2	2
163	NCU2	2	2	1	1	2	2	2	2	3	3	2	2	3	3	3	3	3	3	2	2	1	1	4	4	3	3	4	4	3	3	2	2	4	4	4	4	4	4	4	4	2	2	4	4	1	1	4	4
164	NCU2	2	4	2	2	3	3	3	3	4	4	1	1	2	2	2	2	2	2	1	1	3	3	2	2	1	1	2	2	1	1	4	4	2	2	2	2	3	3	2	2	4	4	3	3	4	4	2	2
165	NCU2	2	2	1	1	2	2	2	2	3	3	2	2	3	3	3	3	3	3	2	2	1	1	4	4	3	3	4	4	3	3	2	2	4	4	4	4	4	4	4	4	2	2	4	4	1	1	4	4
166	NCU2	2	4	2	2	3	3	3	3	4	4	1	1	2	2	2	2	2	2	1	1	3	3	2	2	1	1	2	2	1	1	4	4	2	2	2	2	3	3	2	2	4	4	3	3	4	4	2	2
167	NCU2	2	4	2	2	3	3	3	3	4	4	1	1	2	2	2	2	2	2	1	1	3	3	2	2	1	1	2	2	1	1	4	4	2	2	2	2	3	3	2	2	4	4	3	3	4	4	2	2
168	NCU2	2	4	2	2	3	3	3	3	4	4	1	1	2	2	2	2	2	2	1	1	3	3	2	2	1	1	2	2	1	1	4	4	2	2	2	2	3	3	2	2	4	4	3	3	4	4	2	2
169	NCU2	2	4	2	2	3	3	3	3	4	4	1	1	2	2	2	2	2	2	1	1	3	3	2	2	1	1	2	2	1	1	4	4	2	2	2	2	3	3	2	2	4	4	3	3	4	4	2	2
170	NCU2	2	4	2	2	3	3	3	3	4	4	1	1	2	2	2	2	2	2	1	1	3	3	2	2	1	1	2	2	1	1	4	4	2	2	2	2	3	3	2	2	4	4	3	3	4	4	2	2
171	NCU2	2	2	2	1	2	3	3	2	4	3	2	1	3	2	2	3	3	2	2	1	3	1	4	2	3	1	4	2	3	1	2	4	2	4	4	2	3	4	2	4	4	2	3	4	1	4	2	4
172	NCU2	2	2	1	1	2	2	2	2	3	3	2	2	3	3	3	3	3	3	2	2	1	1	4	4	3	3	4	4	3	3	2	2	4	4	4	4	4	4	0	0	2	2	4	4	1	1	4	4
173	NCU2	2	2	1	1	2	2	2	2	3	3	2	2	3	3	3	3	3	3	2	2	1	1	4	4	3	3	4	4	3	3	2	2	4	4	4	4	4	4	4	4	2	2	4	4	1	1	4	4
174	NCU2	2	2	1	1	2	2	2	2	3	3	2	2	3	3	3	3	3	3	2	2	1	1	4	4	3	3	4	4	3	3	2	2	4	4	4	4	4	4	4	4	2	2	4	4	1	1	4	4
175	NCU2	2	2	2	1	2	3	0	0	4	3	2	1	3	2	2	3	3	2	2	1	3	1	4	2	3	1	4	2	3	1	2	4	2	4	4	2	3	4	2	4	4	2	3	4	1	4	2	4
176	NCU2	2	2	1	1	2	2	2	2	3	3	2	2	3	3	3	3	3	3	2	2	1	1	4	4	3	3	4	4	3	3	2	2	4	4	4	4	4	4	4	4	2	2	4	4	1	1	4	4
177	NCU2	2	2	1	1	2	2	2	2	3	3	2	2	3	3	3	3	3	3	2	2	1	1	4	4	3	3	4	4	3	3	2	2	4	4	4	4	4	4	4	4	2	2	4	4	1	1	4	4
178	NCU2	2	4	2	2	3	3	3	3	4	4	1	1	2	2	2	2	2	2	1	1	3	3	2	2	1	1	2	2	1	1	4	4	2	2	2	2	3	3	2	2	4	4	3	3	4	4	2	2
179	NCU2	2	2	1	1	2	2	2	2	3	3	2	2	3	3	3	3	3	3	2	2	1	1	0	0	3	3	4	4	3	3	2	2	4	4	4	4	4	4	4	4	2	2	4	4	1	1	4	4
180	NCU2	2	2	1	1	2	2	2	2	3	3	2	2	3	3	3	3	3	3	2	2	1	1	4	4	3	3	4	4	3	3	2	2	4	4	4	4	4	4	4	4	2	2	4	4	1	1	4	4
181	NCU3	2	4	2	2	3	3	3	3	4	4	1	1	2	2	2	2	2	2	1	1	3	3	2	2	1	1	2	2	1	1	4	4	2	2	2	2	3	3	2	2	4	4	3	3	4	4	2	2
182	NCU3	2	4	2	2	3	3	3	3	4	4	1	1	2	2	2	2	2	2	1	1	3	3	2	2	1	1	2	2	1	1	4	4	2	2	2	2	3	3	2	2	4	4	3	3	4	4	2	2
183	NCU3	2	4	2	2	3	3	3	3	4	4	1	1	2	2	2	2	2	2	1	1	3	3	2	2	1	1	2	2	1	1	4	4	2	2	2	2	3	3	2	2	4	4	3	3	4	4	2	2
184	NCU3	2	4	2	2	3	3	3	3	4	4	1	1	2	2	2	2	2	2	1	1	3	3	2	2	1	1	2	2	1	1	4	4	2	2	2	2	3	3	2	2	4	4	3	3	4	4	0	0
185	NCU3	2	4	2	2	3	3	3	3	4	4	1	1	2	2	2	2	2	2	1	1	3	3	2	2	1	1	2	2	1	1	4	4	2	2	2	2	3	3	2	2	4	4	3	3	4	4	2	2
186	NCU3	2	4	2	2	3	3	3	3	4	4	1	1	2	2	2	2	2	2	1	1	3	3	2	2	1	1	2	2	1	1	4	4	2	2	2	2	3	3	2	2	4	4	3	3	4	4	2	2
187	NCU3	2	4	2	2	3	3	3	3	4	4	1	1	2	2	2	2	2	2	1	1	3	3	2	2	1	1	2	2	1	1	4	4	2	2	2	2	3	3	2	2	4	4	3	3	4	4	2	2
188	NCU3	2	4	2	2	3	3	3	3	4	4	1	1	2	2	2	2	2	2	1	1	3	3	2	2	1	1	2	2	1	1	4	4	2	2	2	2	3	3	2	2	4	4	3	3	4	4	2	2
189	NCU3	2	4	2	2	3	3	3	3	4	4	1	1	2	2	2	2	2	2	1	1	3	3	2	2	1	1	2	2	1	1	4	4	2	2	2	2	3	3	2	2	4	4	3	3	4	4	2	2
190	NCU3	2	4	2	2	3	3	3	3	4	4	1	1	2	2	2	2	2	2	1	1	3	3	2	2	1	1	2	2	1	1	4	4	2	2	2	2	3	3	2	2	4	4	3	3	4	4	2	2
191	NCU3	2	4	2	2	3	3	3	3	4	4	1	1	2	2	2	2	2	2	1	1	3	3	2	2	1	1	2	2	1	1	4	4	2	2	2	2	3	3	2	2	4	4	3	3	4	4	2	2
192	NCU3	2	4	2	2	3	3	3	3	4	4	1	1	2	2	2	2	2	2	1	1	3	3	2	2	1	1	2	2	1	1	4	4	2	2	2	2	3	3	2	2	4	4	3	3	4	4	2	2
193	NCU3	2	4	2	2	3	3	3	3	4	4	1	1	2	2	2	2	2	2	1	1	3	3	2	2	1	1	2	2	1	1	4	4	2	2	2	2	3	3	2	2	4	4	3	3	4	4	2	2
194	NCU3	2	4	2	2	3	3	3	3	4	4	1	1	2	2	2	2	2	2	1	1	3	3	2	2	1	1	2	2	1	1	4	4	2	2	2	2	3	3	2	2	4	4	3	3	4	4	2	2
195	NCU3	2	4	2	2	3	3	3	3	4	4	1	1	2	2	2	2	2	2	1	1	3	3	2	2	1	1	2	2	1	1	4	4	2	2	2	2	3	3	2	2	4	4	3	3	4	4	2	2
196	NCU3	2	4	2	2	3	3	3	3	4	4	1	1	2	2	2	2	2	2	1	1	3	3	2	2	1	1	2	2	1	1	4	4	2	2	2	2	3	3	2	2	4	4	3	3	4	4	2	2
197	NCU3	2	4	2	2	3	3	3	3	4	4	1	1	2	2	2	2	2	2	1	1	3	3	2	2	1	1	2	2	1	1	4	4	2	2	2	2	3	3	2	2	4	4	3	3	4	4	2	2
198	NCU3	2	4	2	2	3	3	3	3	4	4	1	1	2	2	2	2	2	2	1	1	3	3	2	2	1	1	2	2	1	1	4	4	2	2	2	2	3	3	2	2	4	4	3	3	4	4	2	2
199	NCU3	2	4	2	2	3	3	3	3	4	4	1	1	2	2	2	2	2	2	1	1	3	3	2	2	1	1	2	2	1	1	4	4	2	2	2	2	3	3	2	2	4	4	3	3	4	4	2	2
200	NCU3	2	4	2	2	3	3	3	3	4	4	1	1	2	2	2	2	2	2	1	1	3	3	2	2	1	1	2	2	1	1	4	4	2	2	2	2	3	3	2	2	4	4	3	3	4	4	2	2
201	NCU3	2	4	2	2	3	3	3	3	4	4	1	1	2	2	2	2	2	2	1	1	3	3	2	2	1	1	2	2	1	1	4	4	2	2	2	2	3	3	2	2	4	4	3	3	4	4	2	2
202	NCU3	2	4	2	2	3	3	3	3	4	4	1	1	2	2	2	2	2	2	1	1	3	3	2	2	1	1	2	2	1	1	4	4	2	2	2	2	3	3	2	2	4	4	3	3	4	4	2	2
203	NCU3	2	4	2	2	3	3	3	3	4	4	1	1	2	2	2	2	2	2	1	1	3	3	2	2	1	1	2	2	1	1	2	4	2	2	2	2	3	3	2	2	4	4	3	3	4	4	2	2
204	NCU3	2	4	2	2	3	3	3	3	4	4	1	1	2	2	2	2	2	2	1	1	3	3	2	2	1	1	2	2	1	1	4	4	2	2	2	2	3	3	2	2	4	4	3	3	4	4	2	2
205	NCU4	2	4	2	2	3	3	3	3	4	4	1	1	2	2	2	2	2	2	1	1	3	3	2	2	1	1	2	2	1	1	4	4	2	2	2	2	3	3	2	2	4	4	3	3	4	4	2	2
206	NCU4	2	2	2	1	2	3	3	2	4	3	2	1	3	2	2	3	3	2	2	1	3	1	4	2	3	1	4	2	3	1	2	4	2	4	4	2	3	4	2	4	4	2	3	4	1	4	2	4
207	NCU4	2	4	2	2	3	3	3	3	4	4	1	1	2	2	2	2	2	2	1	1	3	3	2	2	1	1	2	2	1	1	4	4	2	2	2	2	3	3	2	2	4	4	3	3	4	4	2	2
208	NCU4	2	4	2	2	3	3	3	3	4	4	1	1	2	2	2	2	2	2	1	1	3	3	2	2	1	1	2	2	1	1	4	4	2	2	2	2	3	3	2	2	4	4	3	3	4	4	2	2
209	NCU4	2	4	2	2	3	3	3	3	4	4	1	1	2	2	2	2	2	2	1	1	3	3	2	2	1	1	2	2	1	1	4	4	2	2	2	2	3	3	2	2	4	4	3	3	4	4	2	2
210	NCU4	2	4	2	2	3	3	3	3	4	4	1	1	2	2	2	2	2	2	1	1	3	3	2	2	1	1	2	2	1	1	4	4	2	2	2	2	3	3	2	2	4	4	3	3	4	4	2	2
211	NCU4	2	4	2	2	3	3	3	3	4	4	1	1	2	2	2	2	2	2	1	1	3	3	2	2	1	1	2	2	1	1	4	4	2	2	2	2	3	3	2	2	4	4	3	3	4	4	2	2
212	NCU4	2	4	2	2	3	3	3	3	4	4	1	1	2	2	2	2	2	2	1	1	3	3	2	2	1	1	2	2	1	1	4	4	2	2	2	2	3	3	2	2	4	4	3	3	4	4	2	2
213	NCU4	2	4	2	2	3	3	3	3	4	4	1	1	2	2	2	2	2	2	1	1	3	3	2	2	1	1	2	2	1	1	4	4	2	2	2	2	3	3	2	2	4	4	3	3	4	4	2	2
214	NCU4	2	4	2	2	3	3	3	3	4	4	1	1	2	2	2	2	2	2	1	1	3	3	2	2	1	1	2	2	1	1	4	4	2	2	2	2	3	3	2	2	4	4	3	3	0	0	2	2
215	NCU4	2	4	2	2	3	3	3	3	4	4	1	1	2	2	2	2	2	2	1	1	3	3	2	2	1	1	2	2	1	1	4	4	2	2	2	2	3	3	2	2	4	4	3	3	4	4	2	2
216	NCU4	2	2	1	1	2	2	2	2	3	3	2	2	3	3	3	3	3	3	2	2	1	1	4	4	3	3	4	4	3	3	2	2	4	4	4	4	4	4	4	4	2	2	4	4	1	1	4	4
217	NCU4	2	4	2	2	3	3	3	3	4	4	1	1	2	2	2	2	2	2	1	1	3	3	2	2	1	1	2	2	1	1	4	4	2	2	2	2	3	3	2	2	4	4	3	3	4	4	2	2
218	NCU4	2	4	2	2	3	3	3	3	4	4	1	1	2	2	2	2	2	2	1	1	3	3	2	2	1	1	2	2	1	1	4	4	2	2	2	2	3	3	2	2	4	4	3	3	4	4	2	2
219	NCU4	2	4	2	2	3	3	3	3	4	4	1	1	2	2	2	2	2	2	1	1	3	3	2	2	1	1	2	2	1	1	4	4	2	2	2	2	3	3	2	2	4	4	3	3	4	4	2	2
220	NCU4	2	4	2	2	3	3	3	3	4	4	1	1	2	2	2	2	2	2	1	1	3	3	2	2	1	1	2	2	1	1	4	4	2	2	2	2	3	3	2	2	4	4	3	3	4	4	2	2
221	NCU4	2	4	2	2	3	3	3	3	4	4	1	1	2	2	2	2	2	2	1	1	3	3	2	2	1	1	2	2	1	1	4	4	2	2	2	2	3	3	2	2	4	4	3	3	4	4	2	2
222	NCU4	2	4	2	2	3	3	3	3	4	4	1	1	2	2	2	2	2	2	1	1	3	3	2	2	1	1	2	2	1	1	4	4	2	2	2	2	3	3	2	2	4	4	3	3	4	4	2	2
223	NCU4	2	4	2	2	3	3	3	3	4	4	1	1	2	2	2	2	2	2	1	1	3	3	2	2	1	1	2	2	1	1	4	4	2	2	2	2	3	3	2	2	4	4	3	3	4	4	2	2
224	NCU4	2	4	2	2	3	3	3	3	4	4	1	1	2	2	2	2	2	2	1	1	3	3	2	2	1	1	2	2	1	1	4	4	2	2	2	2	3	3	2	2	4	4	3	3	4	4	2	2
225	NCU4	2	4	2	2	3	3	3	3	4	4	1	1	2	2	2	2	2	2	1	1	3	3	2	2	1	1	2	2	1	1	4	4	2	2	2	2	3	3	2	2	4	4	3	3	4	4	2	2
226	NCU4	2	4	2	2	3	3	3	3	4	4	1	1	2	2	2	2	2	2	1	1	3	3	2	2	1	1	2	2	1	1	4	4	2	2	2	2	3	3	2	2	4	4	3	3	4	4	2	2
227	NCU4	2	2	1	1	2	2	2	2	3	3	2	2	3	3	3	3	3	3	2	2	1	1	4	4	3	3	4	4	3	3	2	2	4	4	4	4	4	4	4	4	2	2	4	4	1	1	4	4
228	NCU5	2	2	1	1	2	2	2	2	3	3	2	2	3	3	3	3	3	3	2	2	1	1	4	4	3	3	4	4	3	3	2	2	4	4	4	4	4	4	4	4	2	2	4	4	1	1	4	4
229	NCU5	2	2	1	1	2	2	2	2	3	3	2	2	3	3	3	3	3	3	2	2	1	1	4	4	3	3	4	4	3	3	2	2	4	4	4	4	4	4	4	4	2	2	4	4	1	1	4	4
230	NCU5	2	2	1	1	2	2	2	2	3	3	2	2	3	3	3	3	3	3	2	2	1	1	4	4	3	3	4	4	3	3	2	2	4	4	4	4	4	4	4	4	2	2	4	4	1	1	4	4
231	NCU5	2	2	1	1	2	2	2	2	3	3	2	2	3	3	3	3	3	3	2	2	1	1	4	4	3	3	4	4	3	3	2	2	4	4	4	4	4	4	0	0	2	2	4	4	1	1	4	4
232	NCU5	2	2	1	1	2	2	2	2	3	3	2	1	3	2	3	3	3	3	2	2	3	1	4	4	3	3	4	4	3	3	2	2	2	4	4	4	4	4	2	4	2	2	3	4	1	1	4	4
233	NCU5	2	2	1	1	2	2	2	2	3	3	2	2	3	3	3	3	3	3	2	2	1	1	4	4	3	3	4	4	3	3	2	2	4	4	4	4	4	4	4	4	2	2	4	4	1	1	4	4
234	NCU5	2	2	1	1	2	2	2	2	3	3	2	2	3	3	3	3	3	3	2	2	1	1	4	4	3	3	4	4	3	3	2	2	4	4	4	4	4	4	4	4	2	2	4	4	1	1	4	4
235	NCU5	2	2	1	1	2	2	2	2	3	3	2	2	3	3	3	3	3	3	2	2	1	1	4	4	3	3	4	4	3	3	2	2	4	4	4	4	4	4	4	4	2	2	4	4	1	1	4	4
236	NCU5	2	2	1	1	2	2	2	2	3	3	2	2	3	3	3	3	3	3	2	2	1	1	4	4	3	3	4	4	3	3	2	2	4	4	4	4	4	4	4	4	2	2	4	4	1	1	4	4
237	NCU5	2	2	2	2	2	2	2	2	4	4	2	2	3	3	2	3	3	3	2	1	1	1	4	4	3	3	4	4	3	3	2	2	2	4	4	4	4	4	4	4	2	2	4	4	1	1	2	2
238	NCU5	2	2	1	1	2	2	2	2	3	3	2	2	3	3	3	3	3	3	2	2	1	1	4	4	3	3	4	4	3	3	2	2	4	4	4	4	4	4	4	4	2	2	4	4	1	1	4	4
239	NCU5	2	2	1	1	2	2	2	2	3	3	2	2	3	3	3	3	3	3	2	2	1	1	4	4	3	3	4	4	3	3	2	2	4	4	4	4	4	4	4	4	2	2	4	4	1	1	4	4
240	NCU5	2	2	1	1	2	2	2	2	3	3	2	2	3	3	3	3	3	3	2	2	1	1	4	4	3	3	4	4	3	3	2	2	4	4	4	4	4	4	4	4	2	2	4	4	1	1	4	4
241	NCU5	2	2	1	1	2	2	2	2	3	3	2	2	3	3	3	3	3	3	2	2	1	1	4	4	3	3	4	4	3	3	2	2	4	4	4	4	4	4	4	4	2	2	4	4	1	1	4	4
242	NCU5	2	2	1	1	2	2	2	2	3	3	2	2	3	3	3	3	3	3	2	2	1	1	4	4	3	3	4	4	3	3	2	2	4	4	4	4	4	4	4	4	2	2	4	4	1	1	4	4
243	NCU5	2	2	1	1	2	2	2	2	3	3	2	2	3	3	3	3	3	3	2	2	1	1	4	4	3	3	4	4	3	3	2	2	4	4	4	4	4	4	4	4	2	2	4	4	1	1	4	4
244	NCU5	2	2	1	1	2	2	2	2	3	3	2	2	3	3	3	3	3	3	2	2	1	1	4	4	3	3	4	4	3	3	2	2	4	4	4	4	4	4	4	4	2	2	4	4	1	1	4	4
245	NCU5	2	2	1	1	2	2	2	2	3	3	2	2	3	3	3	3	3	3	2	2	1	1	4	4	3	3	4	4	3	3	2	2	4	4	4	4	4	4	4	4	2	2	4	4	1	1	4	4
246	NCU5	2	2	1	1	2	2	2	2	3	3	2	2	3	3	3	3	3	3	2	2	1	1	4	4	3	3	4	4	3	3	2	2	4	4	4	4	4	4	4	4	2	2	4	4	1	1	4	4
247	NCU5	2	2	1	1	2	2	2	2	3	3	2	2	3	3	3	3	3	3	2	2	1	1	4	4	3	3	4	4	3	3	2	2	4	4	4	4	4	4	4	4	2	2	4	4	1	1	4	4
248	NCU5	2	2	1	1	2	2	2	2	3	3	2	2	3	3	3	3	3	3	2	2	1	1	4	4	3	3	4	4	3	3	2	2	4	4	4	4	4	4	4	4	2	2	4	4	1	1	4	4
249	NCU5	2	2	1	1	2	2	2	2	3	3	2	2	3	3	3	3	3	3	2	2	1	1	4	4	3	3	4	4	3	3	2	2	4	4	4	4	4	4	4	4	2	2	4	4	1	1	4	4
250	NCU5	2	2	1	1	2	2	2	2	3	3	2	2	3	3	3	3	3	3	2	2	1	1	4	4	3	3	4	4	3	3	2	2	4	4	4	4	4	4	4	4	2	2	4	4	1	1	4	4
251	NCU5	2	2	1	1	2	2	0	0	3	3	2	2	3	3	3	3	3	3	2	2	1	1	4	4	3	3	4	4	3	3	2	2	4	4	4	4	4	4	4	4	2	2	4	4	1	1	4	4
252	NCU6	2	2	1	1	2	2	2	2	3	3	2	2	3	3	3	3	3	3	2	2	1	1	4	4	3	3	4	4	3	3	2	2	4	4	4	4	4	4	4	4	2	2	4	4	1	1	4	4
253	NCU6	2	2	1	1	2	2	2	2	3	3	2	2	3	3	3	3	3	3	2	2	1	1	4	4	3	3	4	4	3	3	2	2	4	4	4	4	4	4	4	4	2	2	4	4	1	1	4	4
254	NCU6	2	2	1	1	2	2	2	2	3	3	2	2	3	3	3	3	3	3	2	2	1	1	4	4	3	3	4	4	3	3	2	2	4	4	4	4	4	4	4	4	2	2	4	4	1	1	4	4
255	NCU6	2	2	1	1	2	2	2	2	3	3	2	2	3	3	3	3	3	3	2	2	1	1	4	4	3	3	4	4	3	3	2	2	4	4	4	4	4	4	4	4	2	2	4	4	1	1	4	4
256	NCU6	2	2	1	1	2	2	2	2	3	3	2	2	3	3	3	3	3	2	2	1	1	1	4	4	3	1	4	4	3	3	2	2	4	4	4	4	3	4	2	4	2	2	4	4	1	1	4	4
257	NCU6	2	2	1	1	2	2	2	2	3	3	2	2	3	3	3	3	3	3	2	2	1	1	4	4	3	3	4	4	3	3	2	2	4	4	4	4	4	4	4	4	2	2	4	4	1	1	4	4
258	NCU6	2	2	1	1	2	2	2	2	3	3	2	2	3	3	3	3	3	3	2	2	1	1	4	4	3	3	4	4	3	3	2	2	4	4	4	4	4	4	4	4	2	2	4	4	1	1	4	4
259	NCU6	2	2	1	1	2	2	2	2	3	3	2	2	3	3	3	3	3	3	2	2	1	1	4	4	3	3	4	4	3	3	2	2	4	4	4	4	4	4	4	4	2	2	4	4	1	1	4	4
260	NCU6	2	2	1	1	2	2	2	2	3	3	2	2	3	3	3	3	3	3	2	2	1	1	4	4	3	3	4	4	3	3	2	2	4	4	4	4	4	4	4	4	2	2	4	4	1	1	4	4
261	NCU6	2	2	1	1	2	2	2	2	3	3	2	2	3	3	3	3	3	3	2	2	1	1	4	4	3	3	4	4	3	3	2	2	4	4	0	0	4	4	4	4	2	2	4	4	1	1	4	4
262	NCU6	2	2	1	1	2	3	3	2	3	3	2	2	3	2	3	3	3	3	2	2	3	1	4	4	3	1	4	4	3	1	2	2	2	4	4	2	3	4	2	4	2	2	3	4	1	1	4	4
263	NCU6	2	2	1	1	2	2	2	2	3	3	2	2	3	3	3	3	3	3	2	2	1	1	4	4	3	3	4	4	3	3	2	2	4	4	4	4	4	4	4	4	2	2	4	4	1	1	4	4
264	NCU6	2	2	1	1	2	2	2	2	3	3	2	2	3	3	3	3	3	3	2	2	1	1	4	4	3	3	4	4	3	3	2	2	4	4	4	4	4	4	4	4	2	2	4	4	1	1	4	4
265	NCU6	2	4	2	2	3	3	3	3	4	4	1	1	2	2	2	2	2	2	1	1	3	3	2	2	1	1	2	2	1	1	4	4	2	2	2	2	3	3	2	2	4	4	3	3	4	4	2	2
266	NCU6	2	2	1	1	3	3	2	2	3	3	2	1	3	3	2	3	2	2	2	2	1	1	2	2	3	1	4	2	3	3	2	4	4	4	4	2	3	4	2	4	4	4	3	4	1	4	4	4
267	NCU6	2	2	1	1	2	2	2	2	3	3	2	2	3	3	3	3	2	2	1	1	1	1	4	4	3	3	4	4	3	3	2	2	4	4	4	4	4	4	2	4	2	2	4	4	1	1	4	4
268	NCU6	2	2	1	1	2	2	2	2	3	3	2	2	3	3	3	3	3	3	2	2	1	1	4	4	3	3	4	4	3	3	2	2	4	4	4	4	4	4	4	4	2	2	4	4	1	1	4	4
269	NCU6	2	2	1	1	2	2	2	2	3	3	2	2	3	3	3	3	3	3	2	2	1	1	4	4	3	3	4	4	3	3	2	2	4	4	4	4	4	4	4	4	2	2	4	4	1	1	4	4
270	NCU6	2	2	1	1	2	2	2	2	3	3	2	2	3	3	3	3	3	3	2	2	1	1	4	4	3	3	4	4	3	3	2	2	4	4	4	4	4	4	4	4	2	2	4	4	1	1	4	4
271	NCU6	2	2	1	1	2	2	2	2	3	3	2	2	3	3	3	3	3	3	2	2	1	1	4	4	3	3	4	4	3	3	2	2	4	4	4	4	4	4	4	4	2	2	4	4	1	1	4	4
272	NCU6	2	2	1	1	2	2	2	2	3	3	2	2	3	3	3	3	3	3	2	2	1	1	4	4	3	3	4	4	3	3	2	2	4	4	4	4	4	4	4	4	2	2	4	4	1	1	4	4
273	NCU6	2	2	1	1	2	2	2	2	3	3	2	2	3	3	3	3	3	3	2	2	1	1	4	4	3	3	4	4	3	3	2	2	4	4	4	4	4	4	4	4	2	2	4	4	1	1	4	4
274	NCU6	2	2	1	1	2	2	2	2	4	3	2	2	3	3	3	3	3	3	2	2	1	1	4	4	3	3	4	4	3	3	2	2	4	4	4	4	4	4	4	4	2	2	4	4	1	1	4	4
275	NCU7	2	2	1	1	2	2	2	2	3	3	2	2	3	3	3	3	3	3	2	2	1	1	4	4	3	3	4	4	3	3	2	2	4	4	4	4	4	4	4	4	2	2	4	4	1	1	4	4
276	NCU7	2	2	1	1	2	2	2	2	3	3	2	2	3	3	3	3	3	3	2	2	1	1	4	4	3	3	4	4	3	3	2	2	4	4	4	4	4	4	4	4	2	2	4	4	1	1	4	4
277	NCU7	2	2	1	1	2	2	2	2	3	3	2	2	3	3	3	3	3	3	2	2	1	1	4	4	3	3	4	4	3	3	2	2	4	4	4	4	4	4	4	4	2	2	4	4	1	1	4	4
278	NCU7	2	2	1	1	3	3	3	3	3	3	1	1	2	2	2	2	3	3	1	1	1	1	2	2	1	1	4	4	3	3	2	2	2	2	4	4	3	3	4	4	2	2	4	4	1	1	4	4
279	NCU7	2	2	2	2	2	3	2	2	4	4	2	2	3	3	3	3	3	2	2	1	1	1	4	2	3	3	4	2	3	3	2	4	4	4	4	4	4	4	4	4	2	2	3	4	1	4	2	2
280	NCU7	2	4	2	2	3	3	3	3	4	4	1	1	2	2	2	2	2	2	1	1	3	3	2	2	1	1	2	2	1	1	4	4	2	2	2	2	3	3	2	2	4	4	3	3	4	4	2	2
281	NCU7	2	4	1	1	2	2	2	2	3	3	2	2	3	3	3	3	2	2	2	2	1	1	4	4	1	1	2	2	3	3	4	4	4	4	4	4	4	4	4	4	4	4	4	4	4	4	4	4
282	NCU7	2	2	2	1	2	3	3	3	4	3	1	1	2	2	2	2	3	2	1	1	3	3	2	2	1	1	4	2	3	1	2	4	2	2	4	2	3	3	2	4	4	2	3	4	1	4	2	4
283	NCU7	2	2	1	1	2	2	2	2	3	3	2	2	3	3	3	3	3	3	2	2	1	1	4	4	3	3	4	4	3	3	2	2	4	4	4	4	4	4	4	4	2	2	4	4	1	1	4	4
284	NCU7	2	4	2	2	3	3	3	3	4	4	1	1	2	2	2	2	2	2	1	1	3	3	2	2	1	1	2	2	1	1	4	4	2	2	2	2	3	3	2	2	4	4	3	3	4	4	2	2
285	NCU7	2	4	2	2	3	3	3	3	4	4	1	1	2	2	2	2	2	2	1	1	3	3	2	2	1	1	2	2	1	1	4	4	2	2	2	2	3	3	2	2	4	4	3	3	4	4	2	2
286	NCU7	2	2	1	1	2	2	2	2	3	3	2	2	3	3	3	3	3	3	2	2	1	1	4	4	3	3	4	4	3	3	2	2	4	4	4	4	4	4	4	4	2	2	4	4	1	1	4	4
287	NCU7	2	2	1	1	2	2	2	2	3	3	2	2	3	3	3	3	3	3	2	2	1	1	4	4	3	3	4	4	3	3	2	2	4	4	4	4	4	4	4	4	2	2	4	4	1	1	4	4
288	NCU7	2	2	1	1	2	2	2	2	3	3	2	2	3	3	3	3	2	2	2	2	1	1	4	4	1	1	2	2	3	3	4	4	4	4	4	4	4	4	4	4	4	4	4	4	4	4	4	4
289	NCU7	2	2	1	1	2	2	2	2	3	3	2	2	3	3	3	3	3	3	2	2	1	1	4	4	3	3	4	4	3	3	2	2	4	4	4	4	4	4	4	4	2	2	4	4	1	1	4	4
290	NCU7	2	2	1	1	2	2	2	2	3	3	2	2	3	3	3	3	3	3	2	2	1	1	4	4	3	3	4	4	3	3	2	2	4	4	4	4	4	4	4	4	2	2	4	4	1	1	4	4
291	NCU7	2	2	1	1	2	2	0	0	3	3	2	2	3	3	3	3	3	3	2	2	1	1	4	4	3	3	4	4	3	3	2	2	4	4	4	4	4	4	4	4	2	2	4	4	1	1	4	4
292	NCU7	2	2	1	1	2	2	2	2	3	3	2	2	3	3	3	3	3	3	2	2	1	1	4	4	3	3	4	4	3	3	2	2	4	4	4	4	4	4	4	4	2	2	4	4	1	1	4	4
293	NCU7	2	2	1	1	2	2	2	2	3	3	2	2	3	3	3	3	3	3	2	2	1	1	4	4	3	3	4	4	3	3	2	2	4	4	4	4	4	4	4	4	2	2	4	4	1	1	4	4
294	NCU7	2	2	1	1	2	2	2	2	3	3	2	2	3	3	3	3	3	3	2	2	1	1	4	4	3	3	4	4	3	3	2	2	4	4	4	4	4	4	4	4	2	2	4	4	1	1	4	4
295	NCU7	2	2	1	1	2	2	2	2	3	3	2	2	3	3	3	3	3	3	2	2	1	1	4	4	3	3	4	4	3	3	2	2	4	4	4	4	4	4	4	4	2	2	4	4	1	1	4	4
296	NCU7	2	2	1	1	2	3	3	2	3	3	2	1	3	2	2	3	3	2	2	1	3	1	4	2	1	1	4	2	3	3	2	4	4	4	4	4	3	4	4	4	2	2	3	4	1	4	4	4
297	NCU7	2	2	1	1	2	2	2	2	3	3	2	2	3	3	3	3	3	3	2	2	1	1	4	4	3	3	4	4	3	3	2	2	4	4	4	4	4	4	4	4	2	2	4	4	1	1	4	4
298	NCU7	2	2	1	1	2	2	2	2	3	3	2	2	3	3	3	3	3	3	2	2	1	1	4	4	3	3	4	4	3	3	2	2	4	4	4	4	4	4	4	4	2	2	4	4	1	1	4	4
299	NCU8	2	2	2	2	2	3	3	3	4	4	2	1	2	2	2	2	3	2	1	1	3	3	2	2	1	1	2	2	3	1	2	4	2	2	2	2	3	3	2	2	4	4	3	3	4	4	2	2
300	NCU8	2	2	2	2	2	2	0	0	4	4	2	2	3	2	2	2	3	2	1	1	3	3	4	4	1	1	2	2	3	1	2	4	2	2	2	2	3	3	2	2	4	4	3	3	4	4	2	2
301	NCU8	2	4	2	2	3	3	3	3	4	4	1	1	2	2	2	2	2	2	1	1	3	3	2	2	1	1	2	2	1	1	4	4	2	2	2	2	3	3	2	2	4	4	3	3	4	4	2	2
302	NCU8	2	2	2	1	2	3	3	2	4	3	2	1	3	2	2	3	3	2	2	1	3	1	4	2	3	1	4	2	3	1	2	4	2	4	4	2	3	4	2	4	4	2	3	4	1	4	2	4
303	NCU8	2	4	2	2	3	3	3	3	4	4	1	1	2	2	2	2	2	2	1	1	3	3	2	2	1	1	2	2	1	1	4	4	2	2	2	2	3	3	2	2	4	4	3	3	4	4	2	2
304	NCU8	2	2	2	2	2	3	3	3	4	4	2	1	3	2	2	2	2	2	1	1	3	3	4	2	1	1	2	2	3	1	2	4	2	2	2	2	3	3	2	2	4	4	3	3	4	4	2	2
305	NCU8	2	2	2	1	2	2	2	2	4	3	2	2	3	3	2	3	3	3	2	1	1	1	4	4	1	1	4	2	3	3	2	2	2	2	2	2	3	3	2	2	2	2	3	4	1	4	2	4
306	NCU8	2	2	2	2	3	3	3	2	4	4	2	1	2	2	2	3	2	2	1	1	3	1	4	2	1	1	2	2	1	1	4	4	2	2	4	2	3	3	2	2	4	2	3	3	4	4	2	2
307	NCU8	2	4	2	2	3	3	3	3	4	4	1	1	2	2	2	2	2	2	1	1	3	3	2	2	1	1	2	2	1	1	4	4	2	2	2	2	3	3	2	2	4	4	3	3	4	4	2	2
308	NCU8	2	2	2	2	3	3	3	3	4	4	1	1	2	2	2	2	2	2	1	1	3	3	2	2	3	1	2	2	1	1	4	4	2	2	2	2	3	3	2	2	4	4	3	3	4	4	2	2
309	NCU8	2	4	2	2	3	3	3	3	4	4	1	1	2	2	2	2	2	2	1	1	3	3	2	2	1	1	2	2	1	1	4	4	2	2	2	2	3	3	2	2	4	4	3	3	4	4	2	2
310	NCU8	2	4	2	2	3	3	3	3	4	4	1	1	2	2	2	2	2	2	1	1	3	3	2	2	1	1	2	2	1	1	4	4	2	2	2	2	3	3	2	2	4	4	3	3	4	4	2	2
311	NCU8	2	2	2	2	2	2	3	2	4	4	2	2	3	3	2	3	3	3	1	1	3	3	4	4	3	1	4	2	3	3	2	2	2	4	2	2	3	4	2	2	4	2	3	4	1	4	2	2
312	NCU8	2	4	2	2	3	3	3	3	4	4	1	1	2	2	2	2	2	2	1	1	3	3	2	2	1	1	2	2	1	1	4	4	2	2	2	2	3	3	2	2	4	4	3	3	4	4	2	2
313	NCU8	2	4	2	2	3	3	3	3	4	4	1	1	2	2	2	2	2	2	1	1	3	3	2	2	1	1	2	2	1	1	4	4	2	2	2	2	3	3	2	2	4	4	3	3	4	4	2	2
314	NCU8	2	2	2	1	2	3	3	2	4	3	2	1	3	2	2	3	3	2	2	1	3	1	4	2	3	1	4	2	3	1	2	4	2	4	4	2	3	4	2	4	4	2	3	4	1	4	2	4
315	NCU8	2	4	2	2	3	3	3	3	4	4	1	1	2	2	2	2	2	2	1	1	3	3	2	2	1	1	2	2	1	1	4	4	2	2	2	2	3	3	2	2	4	4	3	3	4	4	2	2
316	NCU8	2	2	1	1	2	2	3	2	3	3	2	2	3	3	2	3	3	3	1	1	1	1	4	4	3	1	4	2	3	3	2	2	2	4	4	4	3	3	4	4	2	2	3	4	1	4	4	4
317	NCU8	2	4	2	2	3	3	3	3	4	4	1	1	2	2	2	2	2	2	1	1	3	3	2	2	1	1	2	2	1	1	4	4	2	2	2	2	3	3	2	2	4	4	3	3	4	4	2	2
318	NCU8	2	4	2	2	3	3	3	3	4	4	1	1	2	2	2	2	2	2	1	1	3	3	2	2	1	1	2	2	1	1	4	4	2	2	2	2	3	3	2	2	4	4	3	3	4	4	2	2
319	NCU8	2	2	1	1	2	2	2	2	3	3	2	2	3	3	3	3	3	3	2	2	1	1	4	4	0	0	4	4	3	3	2	2	4	4	4	4	3	4	4	4	4	4	3	4	1	1	4	4
320	NCU8	2	2	1	1	2	3	3	2	3	3	1	1	3	3	2	2	3	2	2	2	3	1	4	4	3	1	4	4	3	3	2	2	2	2	4	2	3	3	2	4	2	2	3	4	1	1	4	4
321	NCU8	2	4	2	2	3	3	3	3	4	4	1	1	2	2	2	2	2	2	1	1	3	3	2	2	1	1	2	2	1	1	4	4	2	2	2	2	3	3	2	2	4	4	3	3	4	4	2	2
322	NCU8	2	2	2	2	2	2	3	3	4	4	2	1	3	2	2	2	2	2	1	1	3	3	4	2	1	1	2	2	1	1	2	4	2	2	2	2	3	3	2	2	4	4	3	3	4	4	2	2
323	NCU9	2	2	2	1	2	2	2	2	4	3	2	2	3	3	2	3	3	3	2	1	1	1	4	2	3	1	4	2	3	3	2	4	2	4	4	4	4	4	4	4	4	2	4	4	1	4	2	4
324	NCU9	2	2	1	1	2	2	2	2	3	3	2	2	3	3	3	3	3	3	2	2	1	1	4	4	3	3	4	4	3	3	2	2	4	4	4	4	4	4	4	4	2	2	4	4	1	1	4	4
325	NCU9	2	2	1	1	2	2	2	2	3	3	2	2	3	3	3	3	3	3	2	2	1	1	4	4	3	3	4	4	3	3	2	2	4	4	4	4	4	4	4	4	2	2	4	4	1	1	4	4
326	NCU9	2	2	1	1	2	2	2	2	3	3	2	2	3	3	3	3	3	3	2	2	1	1	4	4	3	3	4	4	3	3	2	2	4	4	4	4	4	4	4	4	2	2	4	4	1	1	4	4
327	NCU9	2	2	1	1	2	2	2	2	3	3	2	2	3	3	3	3	3	3	2	2	1	1	4	4	3	3	4	4	3	3	2	2	4	4	4	4	4	4	4	4	2	2	4	4	1	1	4	4
328	NCU9	2	2	1	1	2	2	2	2	3	3	2	2	3	3	3	3	3	3	2	2	1	1	4	4	3	3	4	4	3	3	2	2	4	4	4	4	4	4	4	4	2	2	4	4	1	1	4	4
329	NCU9	2	2	1	1	2	2	0	0	3	3	2	2	3	3	3	3	3	3	2	2	1	1	4	4	3	3	4	4	3	3	2	2	4	4	4	4	4	4	4	4	2	2	4	4	1	1	4	4
330	NCU9	2	2	1	1	2	2	2	2	3	3	2	2	3	3	3	3	3	3	2	2	1	1	4	4	3	3	4	4	3	3	2	2	4	4	4	4	4	4	4	4	2	2	4	4	1	1	4	4
331	NCU9	2	2	1	1	2	2	2	2	3	3	2	2	3	3	3	3	3	3	2	2	1	1	4	4	3	3	4	4	3	3	2	2	4	4	4	4	4	4	4	4	2	2	4	4	1	1	4	4
332	NCU9	2	2	1	1	2	2	2	2	3	3	2	2	3	3	3	3	3	3	2	2	1	1	4	4	3	3	4	4	3	3	2	2	4	4	4	4	4	4	4	4	2	2	4	4	1	1	4	4
333	NCU9	2	2	1	1	2	2	2	2	3	3	2	2	3	3	3	3	3	2	2	2	1	1	4	4	3	3	4	2	3	3	2	4	4	4	4	4	4	4	4	4	2	2	4	4	1	4	4	4
334	NCU9	2	2	1	1	2	2	2	2	3	3	2	2	3	3	3	3	3	3	2	2	1	1	4	4	3	3	4	4	3	3	2	2	4	4	4	4	4	4	4	4	2	2	4	4	1	1	4	4
335	NCU9	2	2	1	1	2	2	2	2	3	3	2	2	3	3	3	3	3	3	2	2	1	1	4	4	3	3	4	4	3	3	2	2	4	4	4	4	4	4	4	4	2	2	4	4	1	1	4	4
336	NCU9	2	2	1	1	2	2	2	2	3	3	2	2	3	3	3	3	3	3	2	2	1	1	4	4	3	3	4	4	3	3	2	2	4	4	4	4	4	4	4	4	2	2	4	4	1	1	4	4
337	NCU9	2	2	1	1	2	2	2	2	3	3	2	2	3	3	3	3	3	3	2	2	1	1	4	4	3	3	4	4	3	3	2	2	4	4	4	4	4	4	4	4	2	2	4	4	1	1	4	4
338	NCU9	2	2	1	1	2	2	2	2	3	3	2	2	3	3	3	3	3	3	2	2	1	1	4	4	3	3	4	4	3	3	2	2	4	4	4	4	4	4	4	4	2	2	4	4	1	1	4	4
339	NCU9	2	2	1	1	2	2	2	2	3	3	2	2	0	0	3	3	3	3	2	2	1	1	4	4	3	3	4	4	3	3	2	2	4	4	4	4	4	4	4	4	2	2	4	4	1	1	4	4
340	NCU9	2	2	1	1	2	2	2	2	3	3	2	2	3	3	3	3	3	3	2	2	1	1	4	4	3	3	4	4	3	3	2	2	4	4	4	4	4	4	4	4	2	2	4	4	1	1	4	4
341	NCU9	2	2	1	1	2	2	0	0	3	3	2	1	3	2	3	3	3	3	2	1	3	1	4	4	3	3	4	2	3	1	2	2	4	4	4	2	4	4	2	4	4	2	3	4	1	4	4	4
342	NCU9	2	2	1	1	2	2	2	2	3	3	2	2	3	3	3	3	3	2	2	1	1	1	4	4	3	3	4	2	3	3	2	4	4	4	4	4	4	4	4	4	2	2	4	4	1	4	4	4
343	NCU9	2	2	1	1	2	2	2	2	3	3	2	2	3	3	3	3	3	3	2	2	1	1	4	4	3	3	4	4	3	3	2	2	4	4	4	4	4	4	4	4	2	2	4	4	1	1	4	4
344	NCU9	2	2	1	1	2	2	2	2	3	3	2	2	3	3	3	3	3	3	2	2	1	1	4	4	3	3	4	4	3	3	2	2	4	4	4	4	4	4	4	4	2	2	4	4	1	1	4	4
345	NCU9	2	2	0	0	2	2	2	2	3	3	2	2	3	3	3	3	3	3	2	2	1	1	4	4	3	3	4	4	3	3	2	2	4	4	4	4	4	4	4	4	2	2	4	4	1	1	4	4
346	NCU10	2	2	1	1	2	2	2	2	3	3	2	2	3	3	3	3	3	3	2	2	1	1	4	4	3	3	4	4	3	3	2	2	4	4	4	4	4	4	4	4	2	2	4	4	1	1	4	4
347	NCU10	2	2	1	1	2	2	2	2	3	3	2	2	3	3	3	3	3	3	2	2	1	1	4	4	3	3	4	4	3	3	2	2	4	4	4	4	4	4	4	4	2	2	4	4	1	1	4	4
348	NCU10	2	2	1	1	2	2	2	2	3	3	2	2	3	3	3	3	3	3	2	2	1	1	4	4	3	3	4	4	3	3	2	2	4	4	4	4	4	4	4	4	2	2	4	4	1	1	4	4
349	NCU10	2	2	1	1	2	2	2	2	3	3	0	0	3	3	3	3	3	3	2	2	1	1	4	4	3	3	4	4	3	3	2	2	4	4	4	4	4	4	4	4	2	2	4	4	1	1	4	4
350	NCU10	2	2	1	1	2	2	2	2	3	3	2	2	3	3	3	3	3	3	2	2	1	1	4	4	3	3	4	4	3	3	2	2	4	4	4	4	4	4	4	4	2	2	4	4	1	1	4	4
351	NCU10	2	2	1	1	2	2	2	2	3	3	2	2	3	3	3	3	3	3	2	2	1	1	4	4	3	3	4	4	3	3	2	2	4	4	4	4	4	4	4	4	2	2	4	4	1	1	4	4
352	NCU10	2	2	1	1	2	2	2	2	3	3	2	2	3	3	3	3	3	3	2	2	1	1	4	4	3	3	4	4	3	3	2	2	4	4	4	4	4	4	4	4	2	2	4	4	1	1	4	4
353	NCU10	2	2	1	1	2	2	2	2	3	3	2	2	3	3	3	3	3	3	2	2	1	1	4	4	3	3	4	4	3	3	2	2	4	4	4	4	4	4	4	4	2	2	4	4	1	1	4	4
354	NCU10	2	2	1	1	2	2	2	2	3	3	2	2	3	3	3	3	0	0	2	2	1	1	4	4	3	3	4	4	3	3	2	2	4	4	4	4	4	4	4	4	2	2	4	4	1	1	4	4
355	NCU10	2	2	1	1	2	2	2	2	3	3	2	2	3	3	3	3	3	3	2	2	1	1	4	4	3	3	4	4	3	3	2	2	4	4	4	4	4	4	4	4	2	2	4	4	1	1	4	4
356	NCU10	2	2	1	1	2	2	2	2	3	3	2	2	3	3	3	3	3	3	2	2	1	1	4	4	3	3	4	4	3	3	2	2	4	4	4	4	4	4	4	4	2	2	4	4	1	1	4	4
357	NCU10	2	2	1	1	2	2	2	2	3	3	2	2	3	3	3	3	3	3	2	2	1	1	4	4	3	3	4	4	3	3	2	2	4	4	4	4	4	4	4	4	2	2	4	4	1	1	4	4
358	NCU10	2	2	1	1	2	2	2	2	3	3	2	2	3	3	3	3	3	3	2	2	1	1	4	4	3	3	4	4	3	3	2	2	4	4	4	4	4	4	4	4	2	2	4	4	1	1	4	4
359	NCU10	2	2	1	1	2	2	2	2	3	3	2	2	3	3	3	3	3	3	2	2	1	1	4	4	3	3	4	4	3	3	2	2	4	4	4	4	4	4	4	4	2	2	4	4	1	1	4	4
360	NCU10	2	2	1	1	2	2	2	2	3	3	2	2	3	3	3	3	3	3	2	2	1	1	4	4	3	3	4	4	3	3	2	2	4	4	4	4	4	4	4	4	2	2	4	4	1	1	4	4
361	NCU10	2	2	1	1	2	2	2	2	3	3	2	2	3	3	3	3	3	3	2	2	1	1	4	4	3	3	4	4	3	3	2	2	4	4	4	4	4	4	4	4	2	2	4	4	1	1	4	4
362	NCU10	2	2	1	1	2	2	2	2	3	3	2	2	3	3	3	3	3	3	2	2	1	1	4	4	3	3	4	4	3	3	2	2	4	4	4	4	4	4	4	4	2	2	4	4	1	1	4	4
363	NCU10	2	2	1	1	2	2	0	0	3	3	2	2	3	3	3	3	3	3	2	2	1	1	4	4	3	3	4	4	3	3	2	2	4	4	4	4	4	4	4	4	2	2	4	4	1	1	4	4
364	NCU10	2	2	1	1	2	2	2	2	3	3	2	2	3	3	3	3	3	3	2	2	1	1	4	4	3	3	4	4	3	3	2	2	4	4	4	4	4	4	4	4	2	2	4	4	1	1	4	4
365	NCU10	2	2	1	1	2	2	2	2	3	3	2	2	3	3	3	3	3	3	2	2	1	1	4	4	3	3	4	4	3	3	2	2	4	4	4	4	4	4	4	4	2	2	4	4	1	1	4	4
366	NCU10	2	2	1	1	2	2	2	2	3	3	2	2	3	3	3	3	3	3	2	2	1	1	4	4	3	3	4	4	3	3	2	2	4	4	4	4	4	4	4	4	2	2	4	4	1	1	4	4
367	NCU10	2	2	1	1	2	2	2	2	3	3	2	2	3	3	3	3	3	3	2	2	1	1	4	4	3	3	4	4	3	3	2	2	4	4	4	4	4	4	4	4	2	2	4	4	1	1	4	4
368	NCU10	2	2	1	1	2	2	2	2	3	3	2	2	3	3	3	3	3	3	2	2	1	1	4	4	3	3	4	4	3	3	2	2	4	4	4	4	4	4	4	4	2	2	4	4	1	1	4	4
369	NCU10	2	2	1	1	2	2	2	2	3	3	2	2	3	3	3	3	3	3	2	2	1	1	4	4	3	3	4	4	3	3	2	2	4	4	4	4	4	4	4	4	2	2	4	4	1	1	4	4
[truncated: 86 more columns]
